# Supplementary material for: Pediatric T-ALL type-1 and type-2 relapses develop along distinct pathways of clonal evolution
Source: PubMed Central journal article supplement (PMC9252914; doi:10.1038/s41375-022-01587-0), 2022-05-18

P27 initial diagnosis  
P27 relapse  
P27 remission

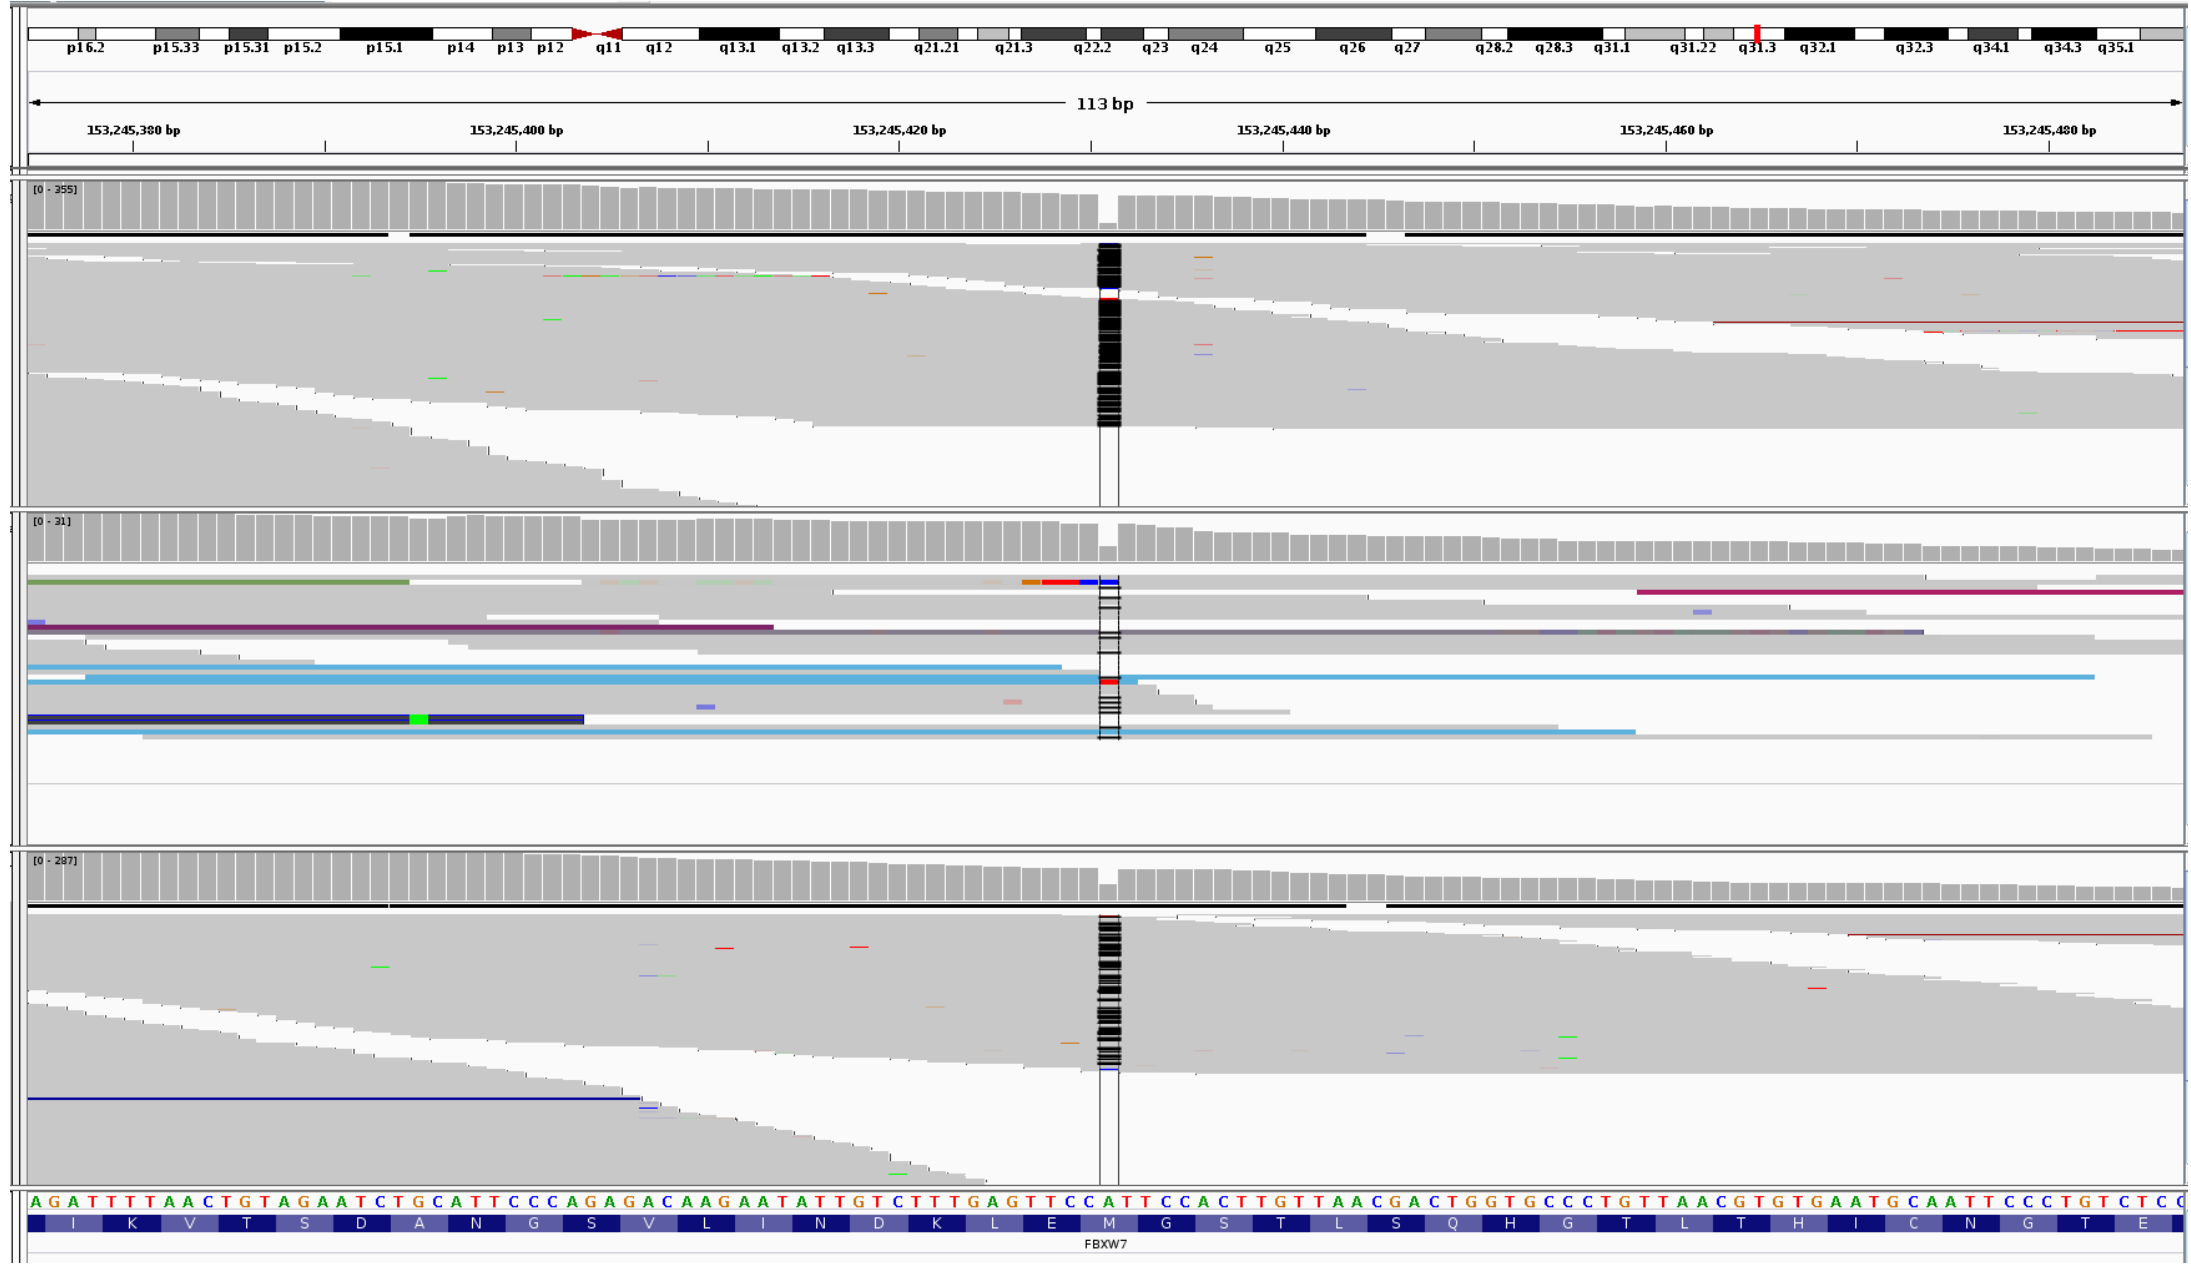

Supplement: 41375_2022_1587_MOESM14_ESM.pdf [file 41375_2022_1587_MOESM14_ESM.pdf]
