# Supplementary material for: Pediatric T-ALL type-1 and type-2 relapses develop along distinct pathways of clonal evolution
Source: PubMed Central journal article supplement (PMC9252914; doi:10.1038/s41375-022-01587-0), 2022-05-18

P5\_REL  
 P5\_RELDPX  
 P5\_INI  
 P5\_NPDX  
 P1\_RELDPX  
 P1\_REL  
 P1\_INI  
 P1\_NPDX  
 P4\_REL  
 P6\_INI  
 P6\_NPDX  
 P6\_REL  
 P6\_RELDPX  
 P12\_INI  
 P12\_NPDX  
 P12\_REL  
 P12\_RELDPX  
 P11\_INI  
 P11\_NPDX  
 P11\_REL  
 P11\_RELDPX  
 P8\_REL  
 P8\_RELDPX  
 P8\_INI  
 P8\_NPDX  
 P10\_RELDPX  
 P10\_REL  
 P10\_INI  
 P10\_NPDX  
 P3\_NPDX  
 P3\_RELDPX  
 P3\_INI  
 P3\_REL  
 P9\_INI  
 P9\_NPDX  
 P9\_REL  
 P9\_RELDPX  
 P4\_RELDPX  
 P4\_INI  
 P4\_NPDX  
 P7\_INI  
 P7\_NPDX  
 P7\_REL  
 P7\_RELDPX

NIK2-4/5

LMO  
2

TAL1/TAL2

HOX  
A

TLX1/3

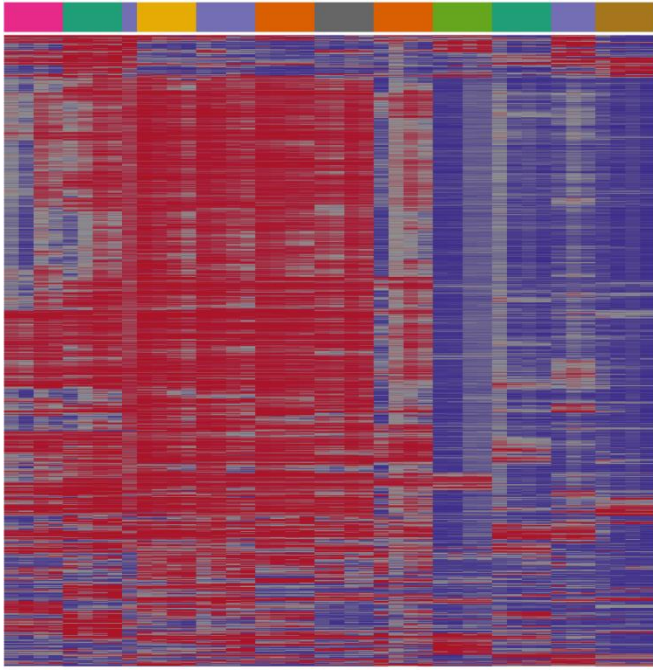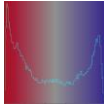

Supplement: 41375_2022_1587_MOESM16_ESM.pdf [file 41375_2022_1587_MOESM16_ESM.pdf]
